# Supplementary material for: Polymorphism/pseudopolymorphism of metal–organic frameworks composed of zinc(ii) and 2-methylimidazole: synthesis, stability, and application in gas storage
Source: Royal Society of Chemistry journal article supplement (doi:10.1039/c6ra19437k), 2016-01-01
Supplement: c6ra19437k1.pdf [file c6ra19437k1.pdf]

**Electronic Supplementary Information**  
**for**

Polymorphism/pseudopolymorphism of metal–organic frameworks  
composed of zinc(II) and 2-methylimidazole: synthesis, stability, and  
application in gas storage

*Yang Lo, Chon Hei Lam, Chao-Wen Chang, An-Chih Yang, and Dun-Yen Kang \**

Department of Chemical Engineering, National Taiwan University

No. 1, Sec. 4, Roosevelt Road, Taipei 10617, Taiwan

\* E-mail: [dunyen@ntu.edu.tw](mailto:dunyen@ntu.edu.tw)

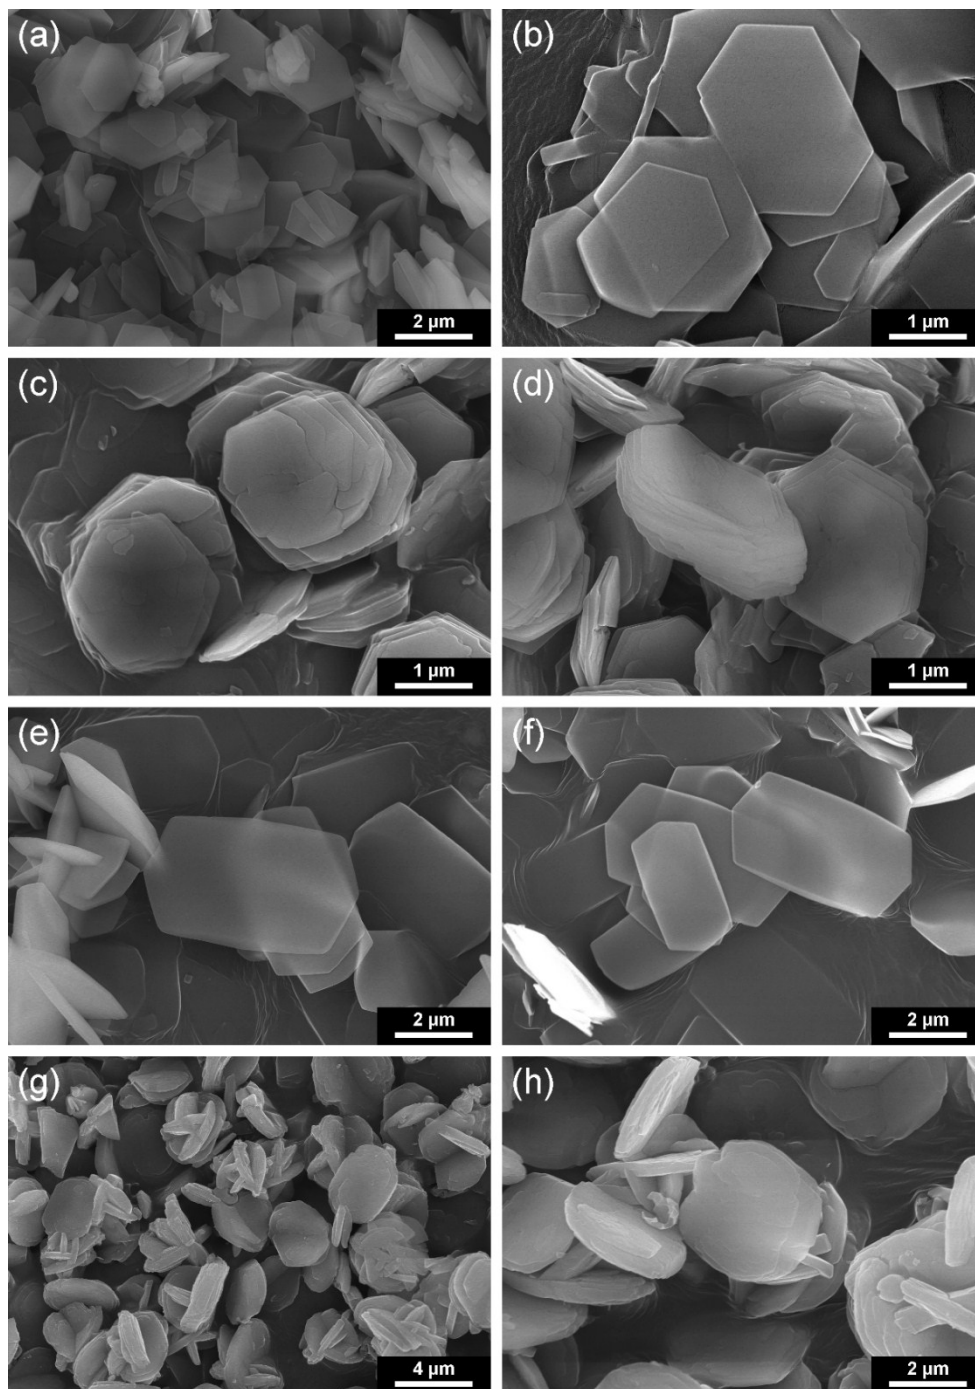

**Fig. S1** Additional SEM images of (a, b) dia(Zn)-HCOONa, (c, d) dia(Zn)-CH<sub>3</sub>COOH, (e, f) dia(Zn)-NH<sub>4</sub>OH, and (g, h) dia(Zn)-control.

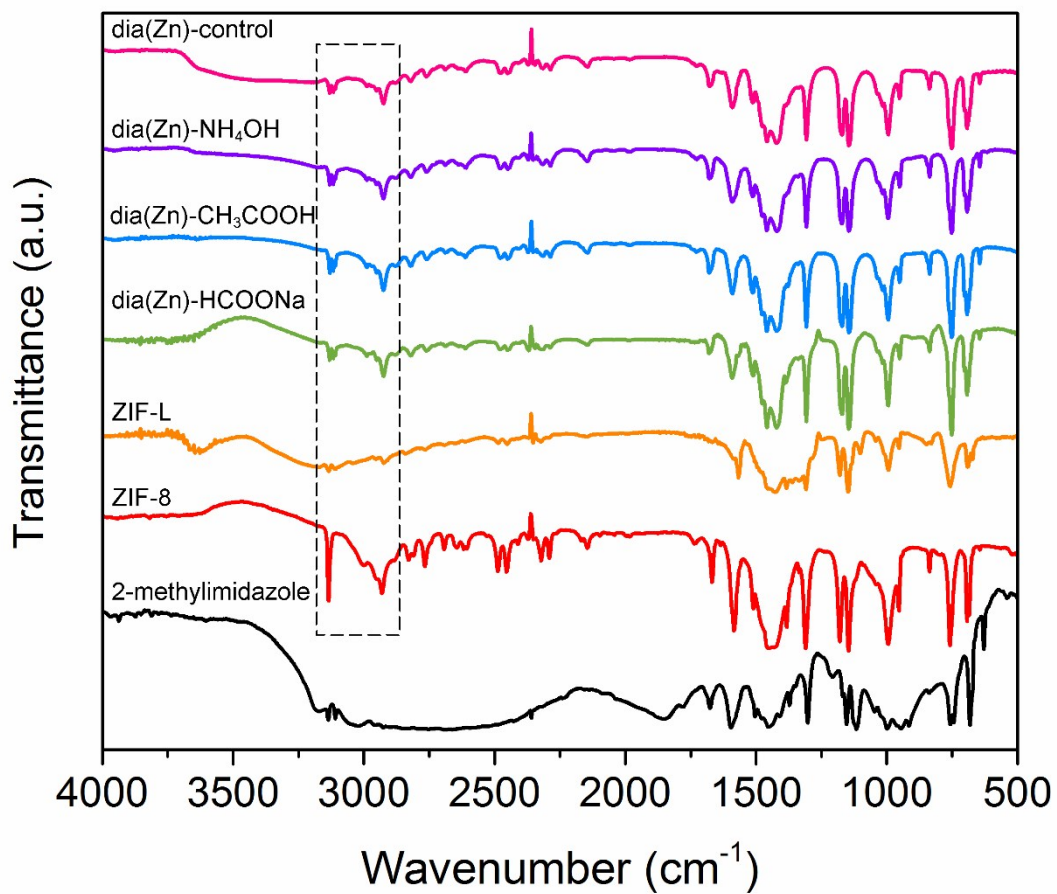

**Fig. S2** FT-IR spectra of the crystals discussed in this work.

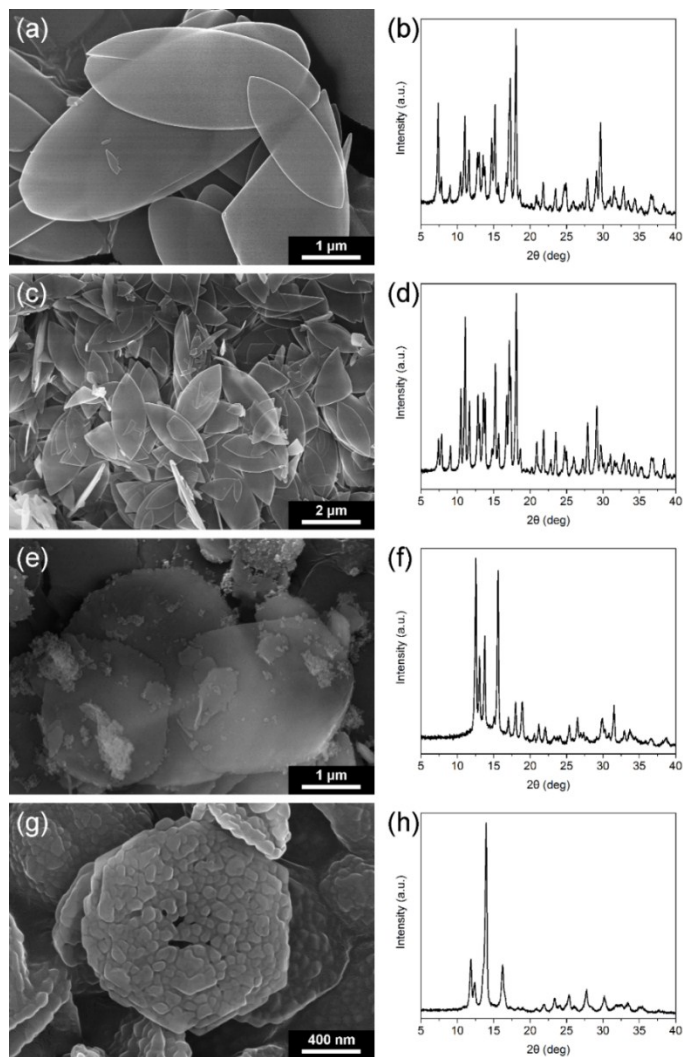

**Fig. S3** (a) SEM image and (b) XRD patterns of the product obtained by seeking to synthesize dia(Zn) with HCOONa at room temperature. The product was ZIF-L. (c) SEM image and (d) XRD patterns of the product obtained by seeking to synthesize dia(Zn) with CH<sub>3</sub>COOH at room temperature. The product was ZIF-L. (e) SEM image and (f) XRD patterns of the product obtained by seeking to synthesize dia(Zn) with NH<sub>4</sub>OH at room temperature. The product showed an unknown phase. (g) SEM image and (h) XRD patterns of the product obtained by seeking to synthesize dia(Zn) without a catalyst at 60 °C. The product showed an unknown phase.

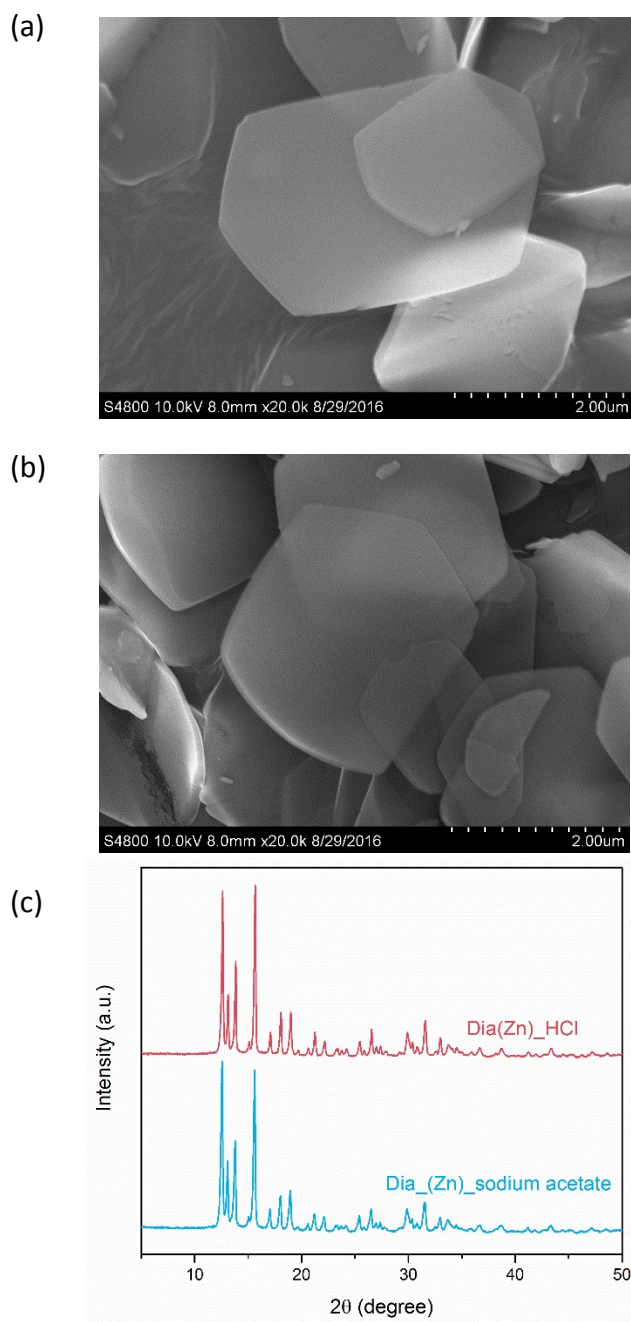

**Fig. S4** SEM images of dia(Zn) synthesized with (a) HCl and (b) CH<sub>3</sub>COONa. (c) XRD patterns of dia(Zn) synthesized with HCl and CH<sub>3</sub>COONa respectively. The synthesis with CH<sub>3</sub>COONa resembled that with HCOONa (see Experimental section in the manuscript). The synthesis with HCl resembled that with CH<sub>3</sub>COOH (see Experimental section in the manuscript), and the pH values of these two batches were adjusted to be identical.

**Table S1.** BET surface area and micropore volume of samples.

|                               | BET Surface Area (m <sup>2</sup> /g) | t-Plot micropore volume (cm <sup>3</sup> STP/g) |
|-------------------------------|--------------------------------------|-------------------------------------------------|
| ZIF-8                         | 1291                                 | 0.681                                           |
| ZIF-L                         | 11.7                                 | 0.00477                                         |
| dia(Zn)-HCOONa                | 6.25                                 | 0.00113                                         |
| dia(Zn) -CH <sub>3</sub> COOH | 11.4                                 | 0.000611                                        |
| dia(Zn)-NH <sub>4</sub> OH    | 10.4                                 | 0.000378                                        |
